# Supplementary material for: Comparative oncology DNA sequencing of canine T cell lymphoma via human hotspot panel
Source: PubMed Central journal article supplement (PMC5978258; doi:10.18632/oncotarget.25209), 2018-04-27
Supplement: oncotarget-09-22693-s001.pdf [file oncotarget-09-22693-s001.pdf]

## **Comparative oncology DNA sequencing of canine T cell lymphoma via human hotspot panel**

### **SUPPLEMENTARY MATERIALS**

**Supplementary Table 1: All mutations screened and identified.** See [Supplementary\\_Table\\_1](#)

**Supplementary Table 2: Mutations categorized based on canine breed.** See [Supplementary\\_Table\\_2](#)

**Supplementary Table 3: Targeted sequencing data for 346 called variants.** See [Supplementary\\_Table\\_3](#)
